# Supplementary material
Source: PubMed Central journal article supplement (PMC6726581)
Supplement: NIHMS1533606-supplement-1.pdf [file NIHMS1533606-supplement-1.pdf]

Table S1. Nucleotide sequence and frequency of ten most abundant TCR clones of tumor-infiltrating and splenic  $\alpha\beta$ T cells, CD4 T cells, and CD8 T cells<sup>a,b</sup>.

| $\alpha\beta$ T | Frequency of Clone | Amino Acid Sequence | Productive Rearrangement                                          | V Chain Resolved  | D Chain Resolved  | J Chain Resolved  |
|-----------------|--------------------|---------------------|-------------------------------------------------------------------|-------------------|-------------------|-------------------|
| Tumor Clone 1   | 4.255%             | CASSSQGADEQYF       | AGGACTCAGCTGTGTATCTGTGT<br>GCCAGCAGTTCGCAGGGGGAGAT<br>GAACAGTAC   | TCRBV15<br>-01*01 | TCRBD01<br>-01*01 | TCRBJ02<br>-07*01 |
| Tumor Clone 2   | 3.546%             | CASSPTGGSYEQYF      | ACTCGGCCACATACTTCTGTGCCA<br>GCAGCCCGACTGGGGGCTCCTAT<br>GAACAGTAC  | TCRBV02<br>-01*01 | TCRBD02<br>-01*01 | TCRBJ02<br>-07*01 |
| Tumor Clone 3   | 2.837%             | CASSSGQGNEQYF       | AGGACTCAGCTGTGTA CTCTGTG<br>CCAGCAGCTCGGGACAGGGCAA<br>TGAACAGTAC  | TCRBV03<br>-01*01 | TCRBD01<br>-01*01 | TCRBJ02<br>-07*01 |
| Tumor Clone 4   | 2.837%             | CASGDEQYF           | TGGCTACCCCTCTCAGACATCAG<br>TGTACTTCTGTGCCAGCGGTGAT<br>GAACAGTAC   | TCRBV13<br>-02*01 | Unknown           | TCRBJ02<br>-07*01 |
| Tumor Clone 5   | 2.837%             | CASSGRDWGYEQYF      | AGACAGCTGTATATTTCTGTGCCA<br>GCAGTGGCCGGGACTGGGGCTAT<br>GAACAGTAC  | TCRBV13<br>-03*01 | TCRBD02<br>-01*01 | TCRBJ02<br>-07*01 |
| Tumor Clone 6   | 2.837%             | CASSETGEQYF         | CTCCCTCTCAGACATCTTTGTA CT<br>TCTGTGCCAGTGAGACAGGTGAA<br>CAGTAC    | TCRBV13<br>-01*02 | TCRBD01<br>-01*01 | TCRBJ02<br>-07*01 |
| Tumor Clone 7   | 2.837%             | CASSLAANSDYTF       | AGGACTCTGCTATGTA CTCTGTG<br>CCAGCTCTCTCGCAGCAA ACTCC<br>GACTACACC | TCRBV12<br>-01*01 | TCRBD01<br>-01*01 | TCRBJ01<br>-02*01 |
| Tumor Clone 8   | 2.837%             | CASSQDLGDSYEQYF     | CGGCCACATATCTGTGCCAGCA<br>GCCAAGATCTGGGGGACTCCTAT<br>GAACAGTAC    | TCRBV12<br>-01*01 | TCRBD02<br>-01*01 | TCRBJ02<br>-07*01 |
| Tumor Clone 9   | 2.127%             | CASSLSSYEQYF        | CCCAGGACTCAGCGGRGTATCTT<br>TGTGCAAGCAGCTTGAGCTCCTAT<br>GAACAGTAC  | TCRBV16<br>-01*01 | Unknown           | TCRBJ02<br>-07*01 |
| Tumor Clone 10  | 2.127%             | CASSRGQSGNTLYF      | ACTCGGCCACATACTTCTGTGCCA<br>GCAGAGGGACAATCTGGAAATAC<br>GCTCTAT    | TCRBV02<br>-01*01 | TCRBD01<br>-01*01 | TCRBJ01<br>-03*01 |

| $\alpha\beta$ T  | Frequency of Clone | Amino Acid Sequence | Productive Rearrangement                                          | V Chain Resolved  | D Chain Resolved  | J Chain Resolved  |
|------------------|--------------------|---------------------|-------------------------------------------------------------------|-------------------|-------------------|-------------------|
| Splenic Clone 1  | 1.761%             | CASTPLGGYDEQYF      | CAGCCACCTATCTCTGTGCCAGCAC<br>CCCGCTGGGGGGGTATGGGGATGA<br>ACAGTAC  | TCRBV14<br>-01*01 | TCRBD02<br>-01*01 | TCRBJ02<br>-07*01 |
| Splenic Clone 2  | 1.408%             | CASRGLVFEQYF        | TTTCTCAGACAGCTGTATATTTCTCT<br>GTGCCAGCAAGGACTGGTCTTTGAA<br>CAGTAC | TCRBV13<br>-03*01 | TCRBD02<br>-01*01 | TCRBJ02<br>-07*01 |
| Splenic Clone 3  | 1.056%             | CASSPDWGDYEQYF      | ATTCTGCCATGTACCTCTGTGCTAG<br>CAGTCCCAGCTGGGGACTATGAAC<br>AGTAC    | TCRBV17<br>-01*01 | TCRBD02<br>-01*01 | TCRBJ02<br>-07*01 |
| Splenic Clone 4  | 1.056%             | CAWLGPYEQYF         | TCAGCCACTCTGGCTTCTACCTCTG<br>TGCTGGAGACTGGGCCCTTATGA<br>ACAGTAC   | TCRBV31<br>-01*01 | TCRBD02<br>-01*01 | TCRBJ02<br>-07*01 |
| Splenic Clone 5  | 1.056%             | CASSPGNQAPLF        | CAGGAGACTCAGCACTGTACCTCTG<br>TGCCAGCAGTCCGGCAACCAGGCT<br>CCGCTT   | TCRBV26<br>-01*01 | Unknown           | TCRBJ01<br>-05*01 |
| Splenic Clone 6  | 1.056%             | CASGDEGTGAYEQYF     | AGACATCAGTGTACTTCTGTGCCAG<br>CGGCGACTGGGGGGCTCCTATGA<br>AGAGTAC   | TCRBV13<br>-02*01 | TCRBD02<br>-01*01 | TCRBJ02<br>-07*01 |
| Splenic Clone 7  | 1.056%             | CASGDEGTGAYEQYF     | CATCAGTGTACTTCTGTGCCAGCGG<br>TGATGAGGGACAGGGGCCTATGA<br>ACAGTAC   | TCRBV13<br>-02*01 | TCRBD01<br>-01*01 | TCRBJ02<br>-07*01 |
| Splenic Clone 8  | 1.056%             | CASSLQYEQYF         | AACTGGAGGACTCTGCTATGTACTT<br>CTGTGCCAGCTCTCTCCAGTATGAA<br>CAGTAC  | TCRBV12<br>-01*01 | TCRBD01<br>-01*01 | TCRBJ02<br>-07*01 |
| Splenic Clone 9  | 1.056%             | CASSLAGQGVGNSDYTF   | TGTATCTGTGTGCCAGCAGTTGGC<br>AGGACAGGGGGTTGGAACTCCGA<br>CTACACC    | TCRBV15<br>-01*01 | TCRBD01<br>-01*01 | TCRBJ01<br>-02*01 |
| Splenic Clone 10 | 1.056%             | CASTPGEDNQAPLF      | AGACATCTGTGTACTTCTGTGCTAG<br>CACCAGGGGAAGACAACCAGGCT<br>CCGCTT    | TCRBV29<br>-01*01 | TCRBD01<br>-01*01 | TCRBJ01<br>-05*01 |

| CD4            | Frequency of Clone | Amino Acid Sequence | Productive Rearrangement                                           | V Chain Resolved  | D Chain Resolved  | J Chain Resolved  |
|----------------|--------------------|---------------------|--------------------------------------------------------------------|-------------------|-------------------|-------------------|
| Tumor Clone 1  | 8.793%             | CASRGTGTDERLFF      | AGATGGCCGTTTTTCTCTGTGCCA<br>GCAGAGGGACAGGGACCGACGAA<br>AGATTATTT   | TCRBV19<br>-01*01 | TCRBD01<br>-01*01 | TCRBJ01<br>-04*01 |
| Tumor Clone 2  | 4.499%             | CASIKLGS AETLYF     | AGATGGCCGTTTTTCTCTGTGCCA<br>GCATAAACTGGGTAGTGCAGAA<br>ACGCTGTAT    | TCRBV19<br>-01*01 | TCRBD02<br>-01*01 | TCRBJ02<br>-03*01 |
| Tumor Clone 3  | 1.636%             | CTCSADPQGEYTF       | GCCAGGGCAGAACCTGTACTGC<br>ACCCGCAGTGCAGATCCCAGGG<br>AGAGTACACC     | TCRBV01<br>-01*01 | TCRBD01<br>-01*01 | TCRBJ01<br>-02*01 |
| Tumor Clone 4  | 1.636%             | CASSQDNSGNTLYF      | ACTCGGCCACATACTTCTGTGCCA<br>GCAGCCAAGACAATTCTGGAAAT<br>ACGCTCTAT   | TCRBV02<br>-01*01 | TCRBD01<br>-01*01 | TCRBJ01<br>-03*01 |
| Tumor Clone 5  | 1.431%             | CASSQGRAGAEQFF      | ACTCGGCCACATACTTCTGTGCCA<br>GCAGCCAAGGGAGGGCGGGCCT<br>GCTGAGCAGTTC | TCRBV02<br>-01*01 | Unknown           | TCRBJ02<br>-01*01 |
| Tumor Clone 6  | 1.227%             | CASSQDLGSSYEQYF     | CGGCCACATACTTCTGTGCCAGC<br>AGCCAAGACCTGGGGAGCCCCTA<br>TGAACAGTAC   | TCRBV19<br>-01*01 | TCRBD02<br>-01*01 | TCRBJ02<br>-07*01 |
| Tumor Clone 7  | 1.227%             | CASRVTGS AETLYF     | AGATGGCCGTTTTTCTCTGTGCCA<br>GCAGAGTGACTGGGAGTGCAGAA<br>ACGCTGTAT   | TCRBV02<br>-01*01 | TCRBD02<br>-01*01 | TCRBJ02<br>-03*01 |
| Tumor Clone 8  | 1.022%             | CASSQDYISNERLFF     | CGGCCACATACTTCTGTGCCAGC<br>AGCCAAGATTACATATCCAACGAA<br>AGATTATTT   | TCRBV16<br>-01*01 | TCRBD01<br>-01*01 | TCRBJ01<br>-04*01 |
| Tumor Clone 9  | 1.022%             | CASSLAGQSGNTLYF     | CAGCGGTGTATCTTTGTGCAAGC<br>AGCTTAGCGGGACAATCTGGAAA<br>TACGCTCTAT   | TCRBV16<br>-01*01 | TCRBD01<br>-01*01 | TCRBJ01<br>-03*01 |
| Tumor Clone 10 | 1.022%             | CASSLQGTGQLYF       | ACTCAGCTGTGTA CTCTGTGCCA<br>GCAGCTTGAGGGACCACGGG<br>CAGCTCTAC      | TCRBV03<br>-01*01 | TCRBD02<br>-01*01 | TCRBJ02<br>-02*01 |

| CD8            | Frequency of Clone | Amino Acid Sequence | Productive Rearrangement                                         | V Chain Resolved  | D Chain Resolved  | J Chain Resolved  |
|----------------|--------------------|---------------------|------------------------------------------------------------------|-------------------|-------------------|-------------------|
| Tumor Clone 1  | 9.722%             | CASSLELGGREQYF      | ACTCAGCGGTGTATCTTTGTGCAA<br>GCAGCTTAGAACTGGGGGGCGC<br>GAACAGTAC  | TCRBV16<br>-01*01 | TCRBD02<br>-01*01 | TCRBJ02<br>-07*01 |
| Tumor Clone 2  | 8.796%             | CGASGQGPERLFF       | AAGACAGAGGCTTATATCTCTGTG<br>GTGCTAGCGGACAGGGGCCCGAA<br>AGATTATT  | TCRBV20<br>-01*01 | TCRBD01<br>-01*01 | TCRBJ01<br>-04*01 |
| Tumor Clone 3  | 7.407%             | CASSQEGDNQAPLF      | ACTCGGCCACATACTTCTGTGCCA<br>GCAGCCAAGAGGGGGACAACCAG<br>GCTCCGCTT | TCRBV02<br>-01*01 | Unknwon           | TCRBJ01<br>-05*01 |
| Tumor Clone 4  | 3.241%             | CASSQDWLGGLSYEQYF   | TCTATTTTTGTGCCAGCAGCCAAG<br>ATTGGCTGGGGGGCTCTCCTAT<br>GAACAGTAC  | TCRBV05<br>-01*01 | TCRBD02<br>-01*01 | TCRBJ02<br>-07*01 |
| Tumor Clone 5  | 2.778%             | CASSKAGASAETLYF     | CTGCTGTGTATCTCTGTGCCAGCA<br>GCAAGGCAGGAGCTAGTGCAGAA<br>ACGCTGTAT | TCRBV04<br>-02*01 | TCRBD01<br>-01*01 | TCRBJ02<br>-03*01 |
| Tumor Clone 6  | 2.778%             | CASSLMGYEQYF        | CCAAGGACTCAGCTGTCTATCTGT<br>GTGCCAGCAGTTAACTGGGTGC<br>TGAGCAGTTC | TCRBV15<br>-01*01 | TCRBD02<br>-01*01 | TCRBJ02<br>-07*01 |
| Tumor Clone 7  | 2.315%             | CASSRDRVAEQFF       | ACGAGATGGCCGTTTTTCTCTGTG<br>CCAGCAGTCGGGACAGGGTTGCT<br>GAGCAGTTC | TCRBV19<br>-01*01 | TCRBD01<br>-01*01 | TCRBJ02<br>-01*01 |
| Tumor Clone 8  | 1.389%             | CASSMGLDEQYF        | ACGAGATGGCCGTTTTTCTCTGTG<br>CCAGCAGTATGGGGGGCTGGAT<br>GAACAGTAC  | TCRBV19<br>-01*01 | TCRBD02<br>-01*01 | TCRBJ02<br>-07*01 |
| Tumor Clone 9  | 1.389%             | CARAGASYEQYF        | AAGACGACTCAGCACTGTAGCTC<br>TGTGCCAGGGCTGGGCCTCCTAT<br>GAACAGTAC  | TCRBV24<br>-01*01 | TCRBD02<br>-01*01 | TCRBJ02<br>-07*01 |
| Tumor Clone 10 | 1.389%             | CASSRDWGDGEQYF      | ACTCAGCTGTGTACTTCTGTGCCA<br>GCAGAGGGACTGGGGGGATGGC<br>TGAACAGTAC | TCRBV03<br>-01*01 | TCRBD02<br>-01*01 | TCRBJ02<br>-07*01 |

<sup>a</sup>The frequency of each clone within the T cell population is shown as well as the cysteine to phenylalanine amino acid sequence of the TCR. The full productive rearrangement for each clone including the V-gene, CDR3 region, N1 junction, D-gene, N2 Junction, and J-Gene is indicated. The resolved V, D, and J-Chains, if known, are listed for each clone.

<sup>b</sup> Grey = V-Gene

Green = Start of CDR3 Region in V-Gene

Purple = N1 Junction

Blue = D-Gene

Red = N2 Junction

Orange = J-Gene
