# Supplementary material
Source: PubMed Central journal article supplement (PMC6726581)
Supplement: NIHMS1533606-supplement-2.pdf [file NIHMS1533606-supplement-2.pdf]

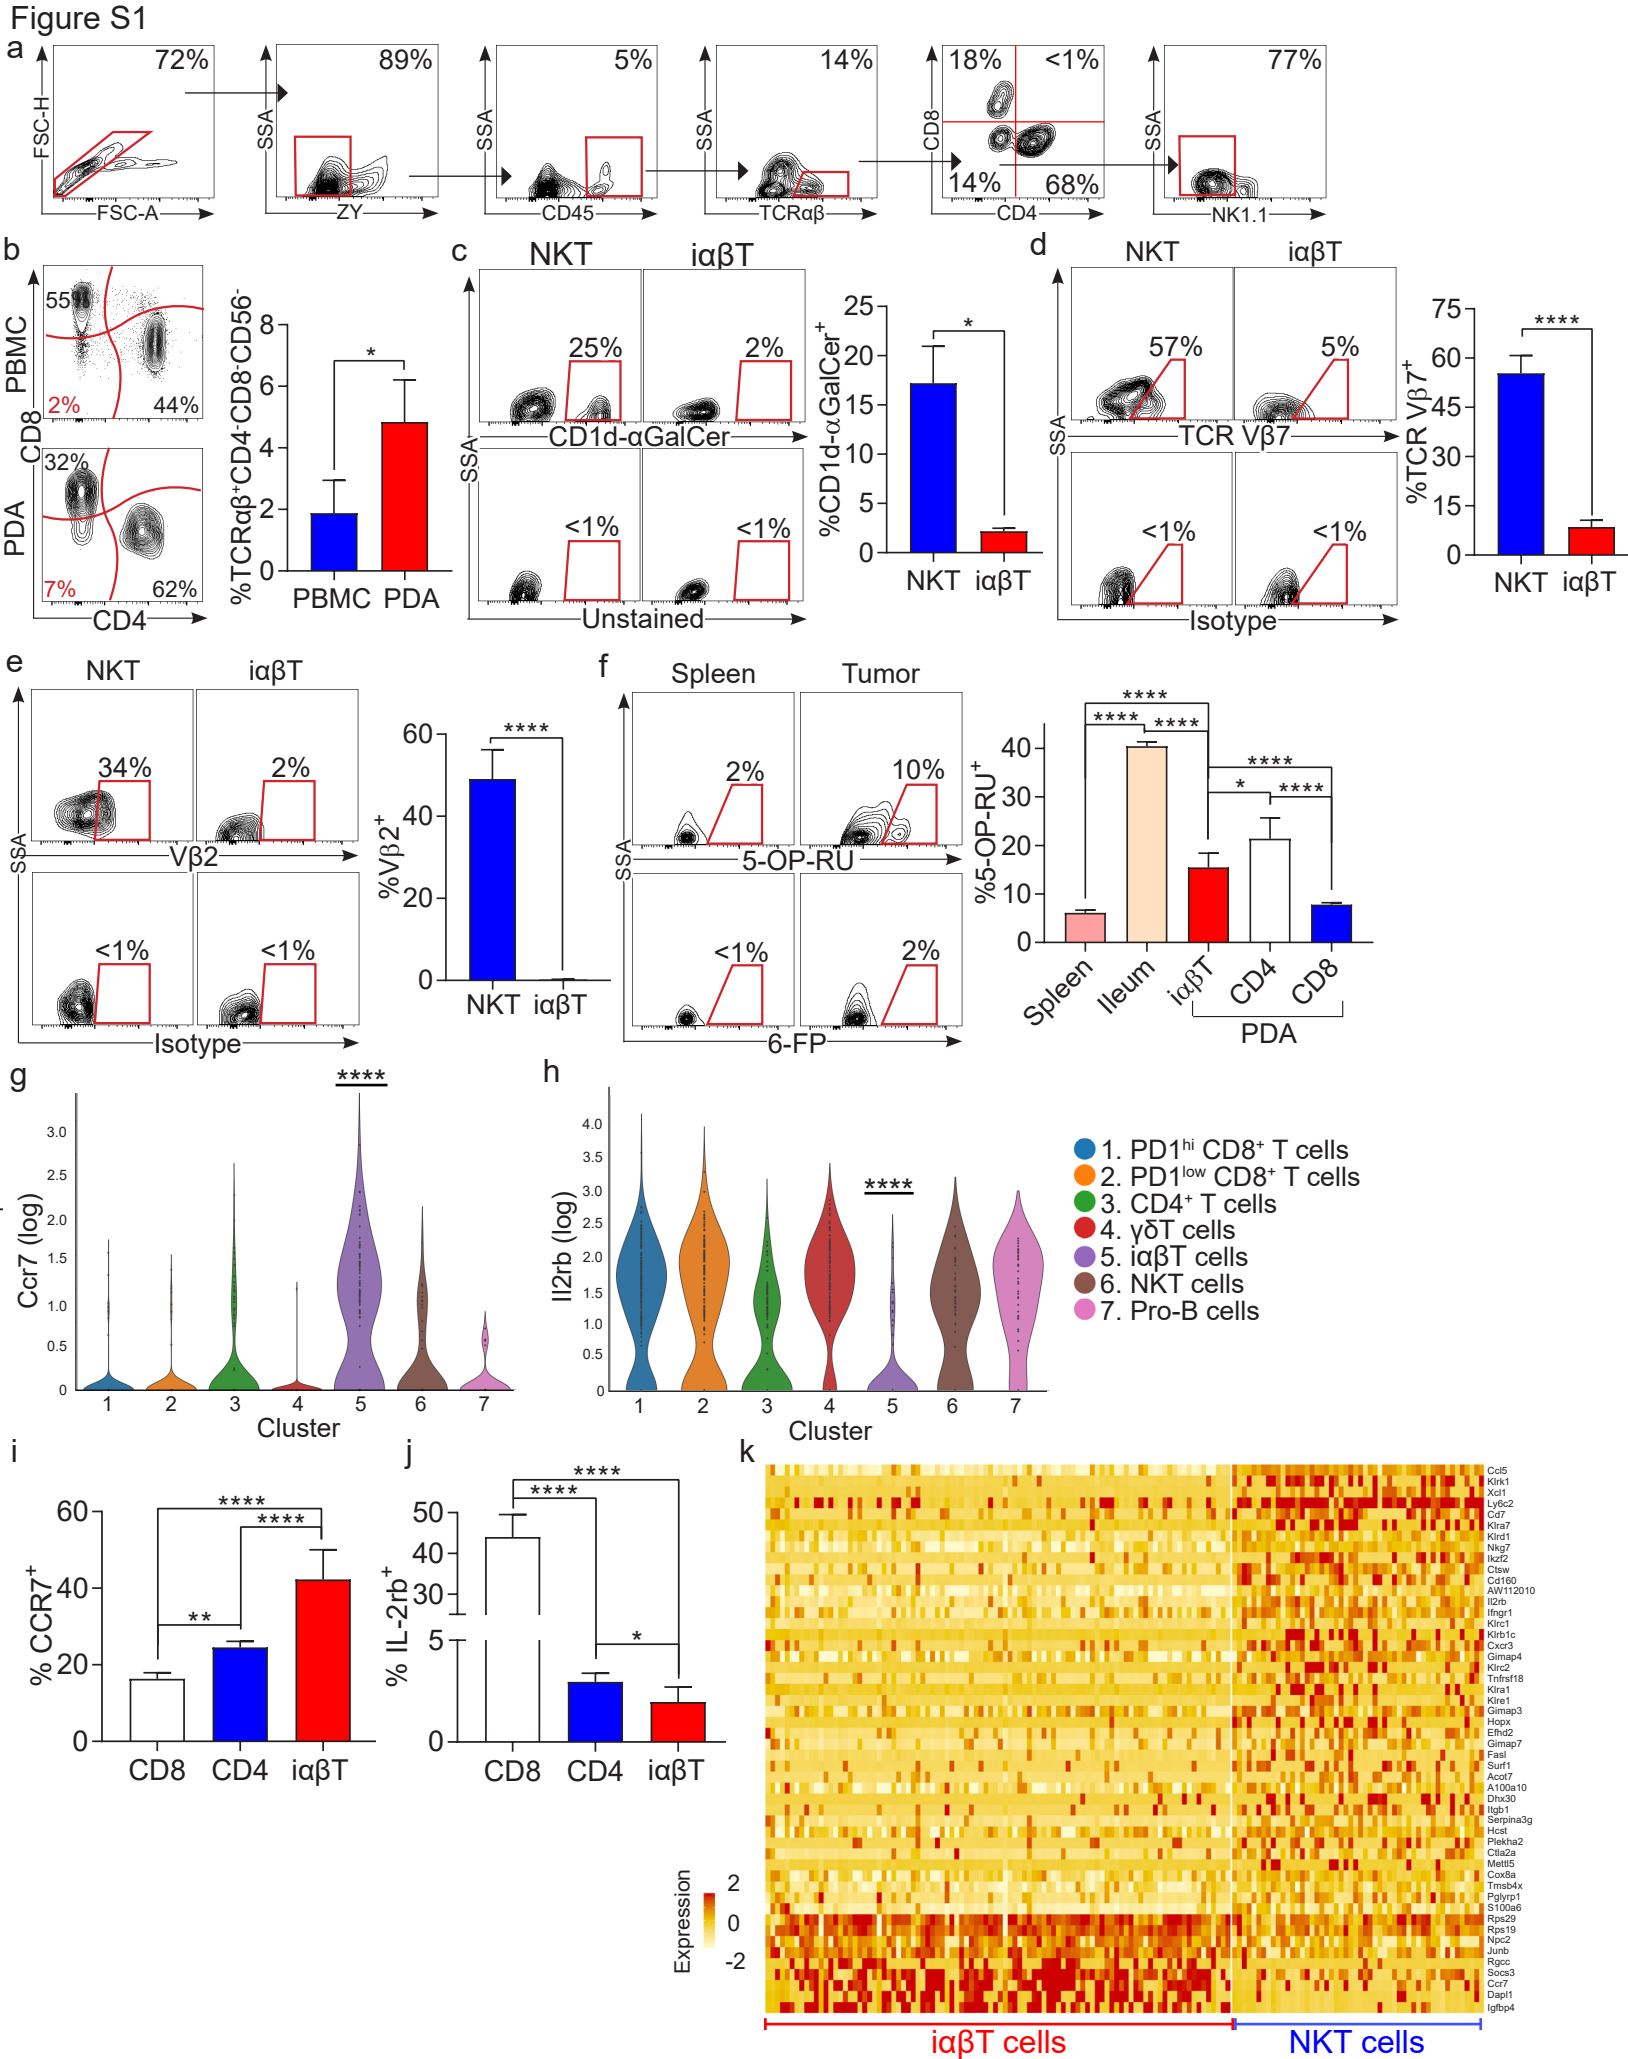

**Figure S1.  $\alpha\beta$ Ts do not express NKT-specific TCR chains or associated surface markers.** (a) Live singlet CD45<sup>+</sup> leukocytes from day 21 orthotopic KPC tumors and spleens in WT mice were gated for further analysis as shown in Figure 1a. (b) CD45<sup>+</sup>TCR $\alpha\beta$ <sup>+</sup>CD56<sup>-</sup> leukocytes from pancreatic tumors and PBMC of PDA patients were gated and tested for expression of CD4 and CD8. Representative contour plots and quantitative data are shown (n=5 patients). (c) Murine CD45<sup>+</sup>TCR $\beta$ <sup>+</sup>CD4<sup>-</sup>CD8<sup>-</sup>NK1.1<sup>-</sup> and CD45<sup>+</sup>TCR $\beta$ <sup>+</sup>CD4<sup>-</sup>CD8<sup>-</sup>NK1.1<sup>+</sup> cells were stimulated with  $\alpha$ -GalCer and tested for expression of the  $\alpha$ -GalCer:CD1d complex. (d, e) PDA-infiltrating murine CD45<sup>+</sup>TCR $\beta$ <sup>+</sup>CD4<sup>-</sup>CD8<sup>-</sup>NK1.1<sup>-</sup> and CD45<sup>+</sup>TCR $\beta$ <sup>+</sup>CD4<sup>-</sup>CD8<sup>-</sup>NK1.1<sup>+</sup> cells were each gated and tested for expression of (d) TCR V $\beta$ 7 and (e) TCR V $\beta$ 2 compared to isotype control. Representative contour plots and quantitative data are shown. (f) Murine CD45<sup>+</sup>CD3<sup>+</sup>CD4<sup>-</sup>CD8<sup>-</sup>NK1.1<sup>-</sup> cells were isolated from spleen, ileum, and PDA and CD4<sup>+</sup> and CD8<sup>+</sup> T cells were isolated from PDA and were tested for expression of MR1 specific tetramer (5-OP-RU), compared to control tetramer (6-FP). Representative contour plots are shown. (g, h) Orthotopic KPC tumors were harvested from WT mice on day 21. CD45<sup>+</sup>CD3<sup>+</sup> leukocytes were purified by FACS and analyzed by single cell RNAseq. Violin plots comparing normalized log expression of (g) *Ccr7* and (h) *Il2rb* in each lymphocyte cluster are shown. (i, j) Orthotopic KPC tumors were harvested from WT mice. Select lymphocyte subsets were analyzed by flow cytometry for expression of (i) CCR7 and (j) IL-2rb. This experiment was performed in 10 replicates per group. (k) Heat map depicting top 50 transcriptomic changes in the  $\alpha\beta$ T and NKT clusters (\*p<0.05, \*\*p<0.01, \*\*\*\*p<0.0001).

Figure S2

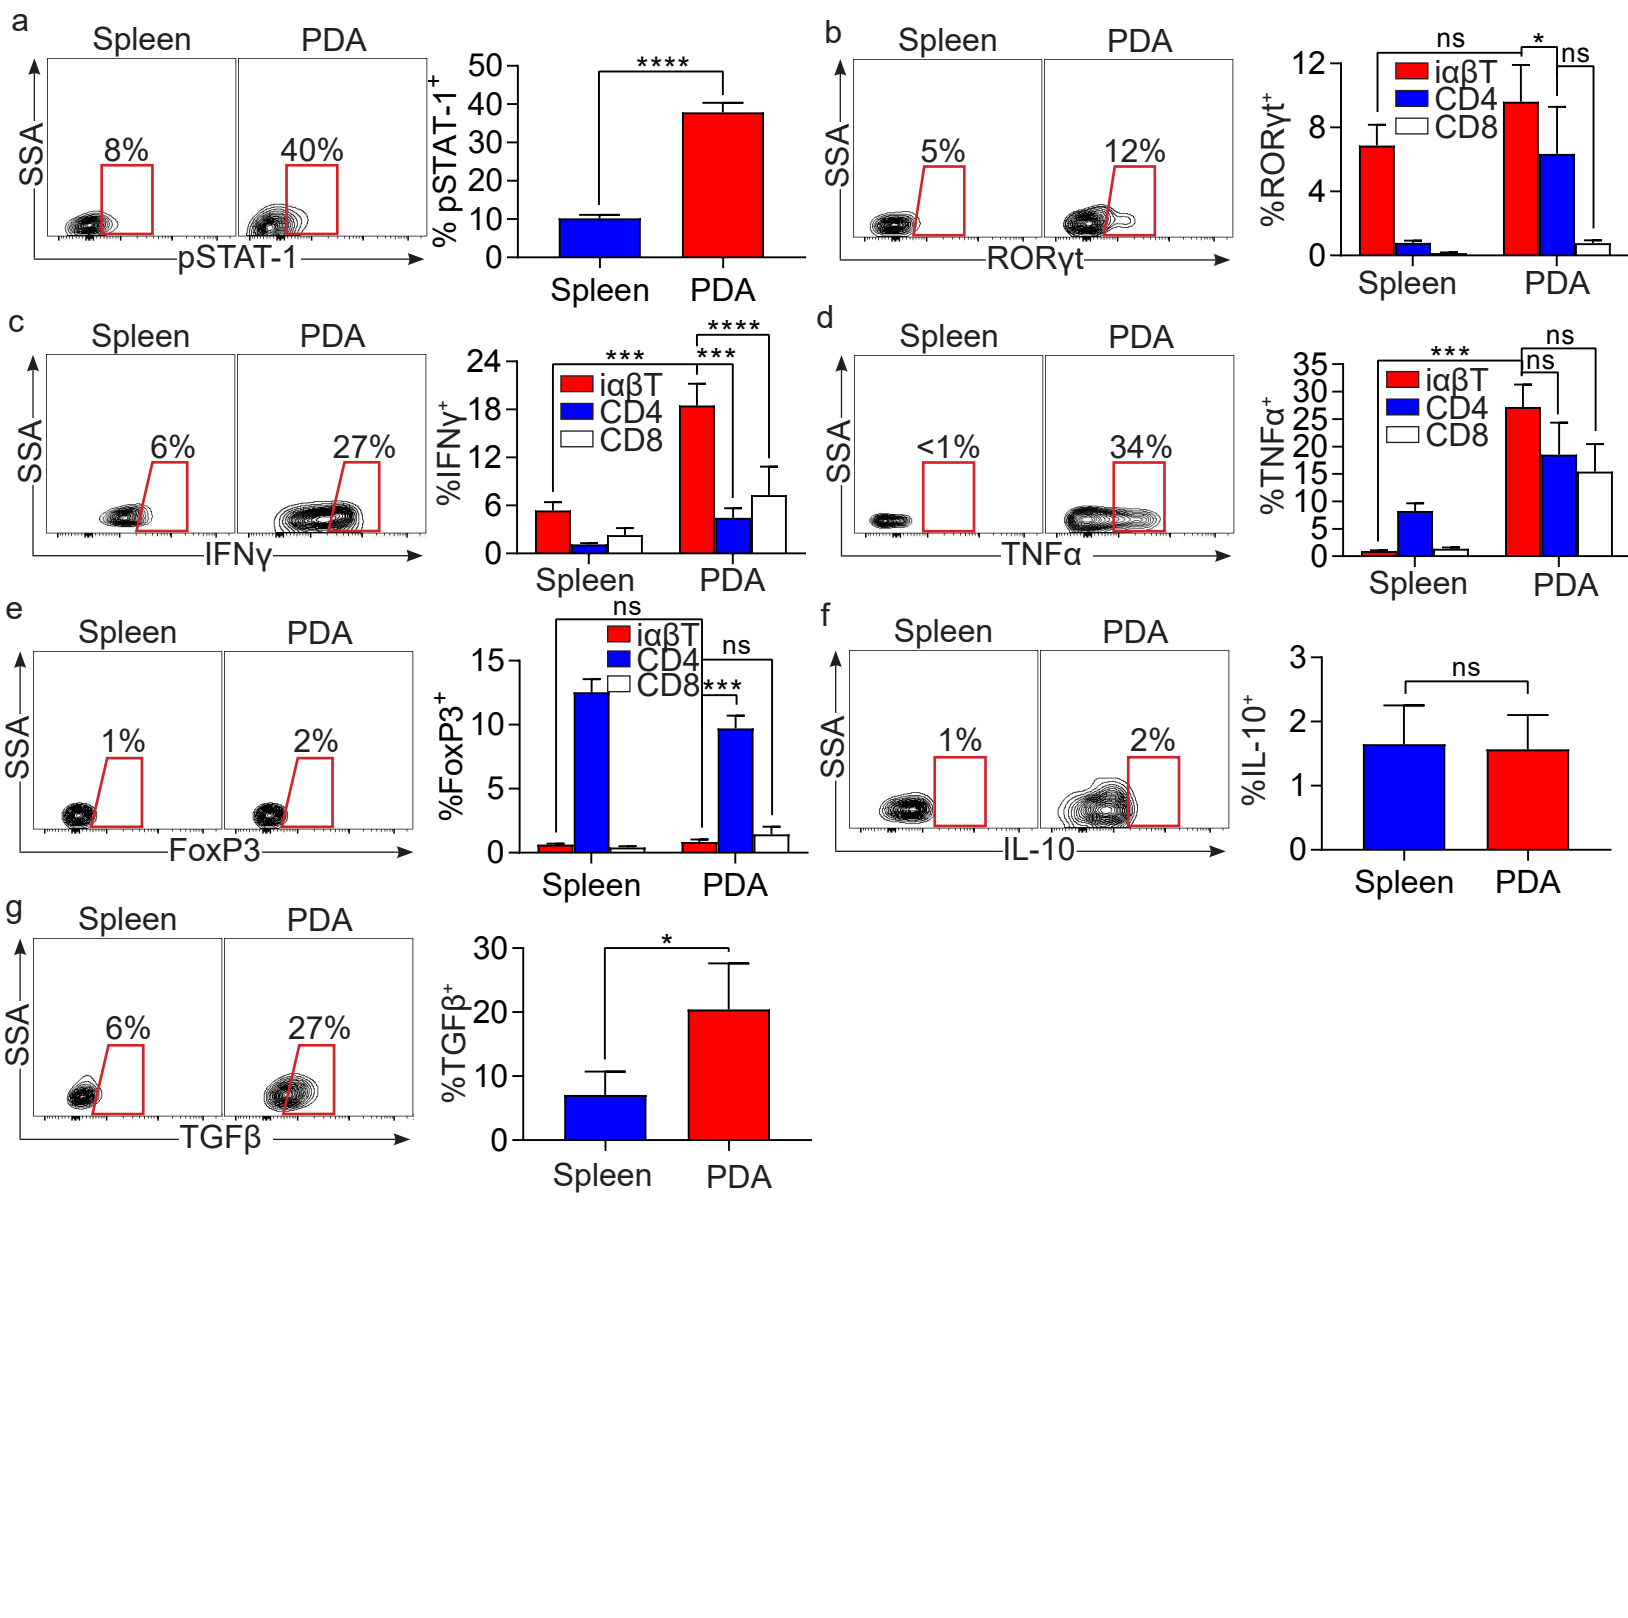

**Figure S2.  $\text{i}\alpha\beta\text{T}$ s exhibit a distinct phenotype in PDA and are the dominant IL-17 producing T cells.** (a) Splenic and orthotopic PDA-infiltrating  $\text{i}\alpha\beta\text{T}$ s were tested for expression of pSTAT-1. (b-e) Splenic and PDA-infiltrating  $\text{i}\alpha\beta\text{T}$ s,  $\text{CD4}^+$  T cells,  $\text{CD8}^+$  T cells were tested for expression of (b)  $\text{ROR}\gamma\text{t}$ , (c)  $\text{IFN}\gamma$ , (d)  $\text{TNF}\alpha$ , and (e) FoxP3. (f, g) Splenic and orthotopic PDA-infiltrating  $\text{i}\alpha\beta\text{T}$ s were tested for expression of (f) IL-10 and (g)  $\text{TGF}\beta$ . Each experiment was repeated at least 4 times (n=5/group; \*p<0.05, \*\*p<0.01, \*\*\*p<0.001, \*\*\*\*p<0.0001).

Figure S3

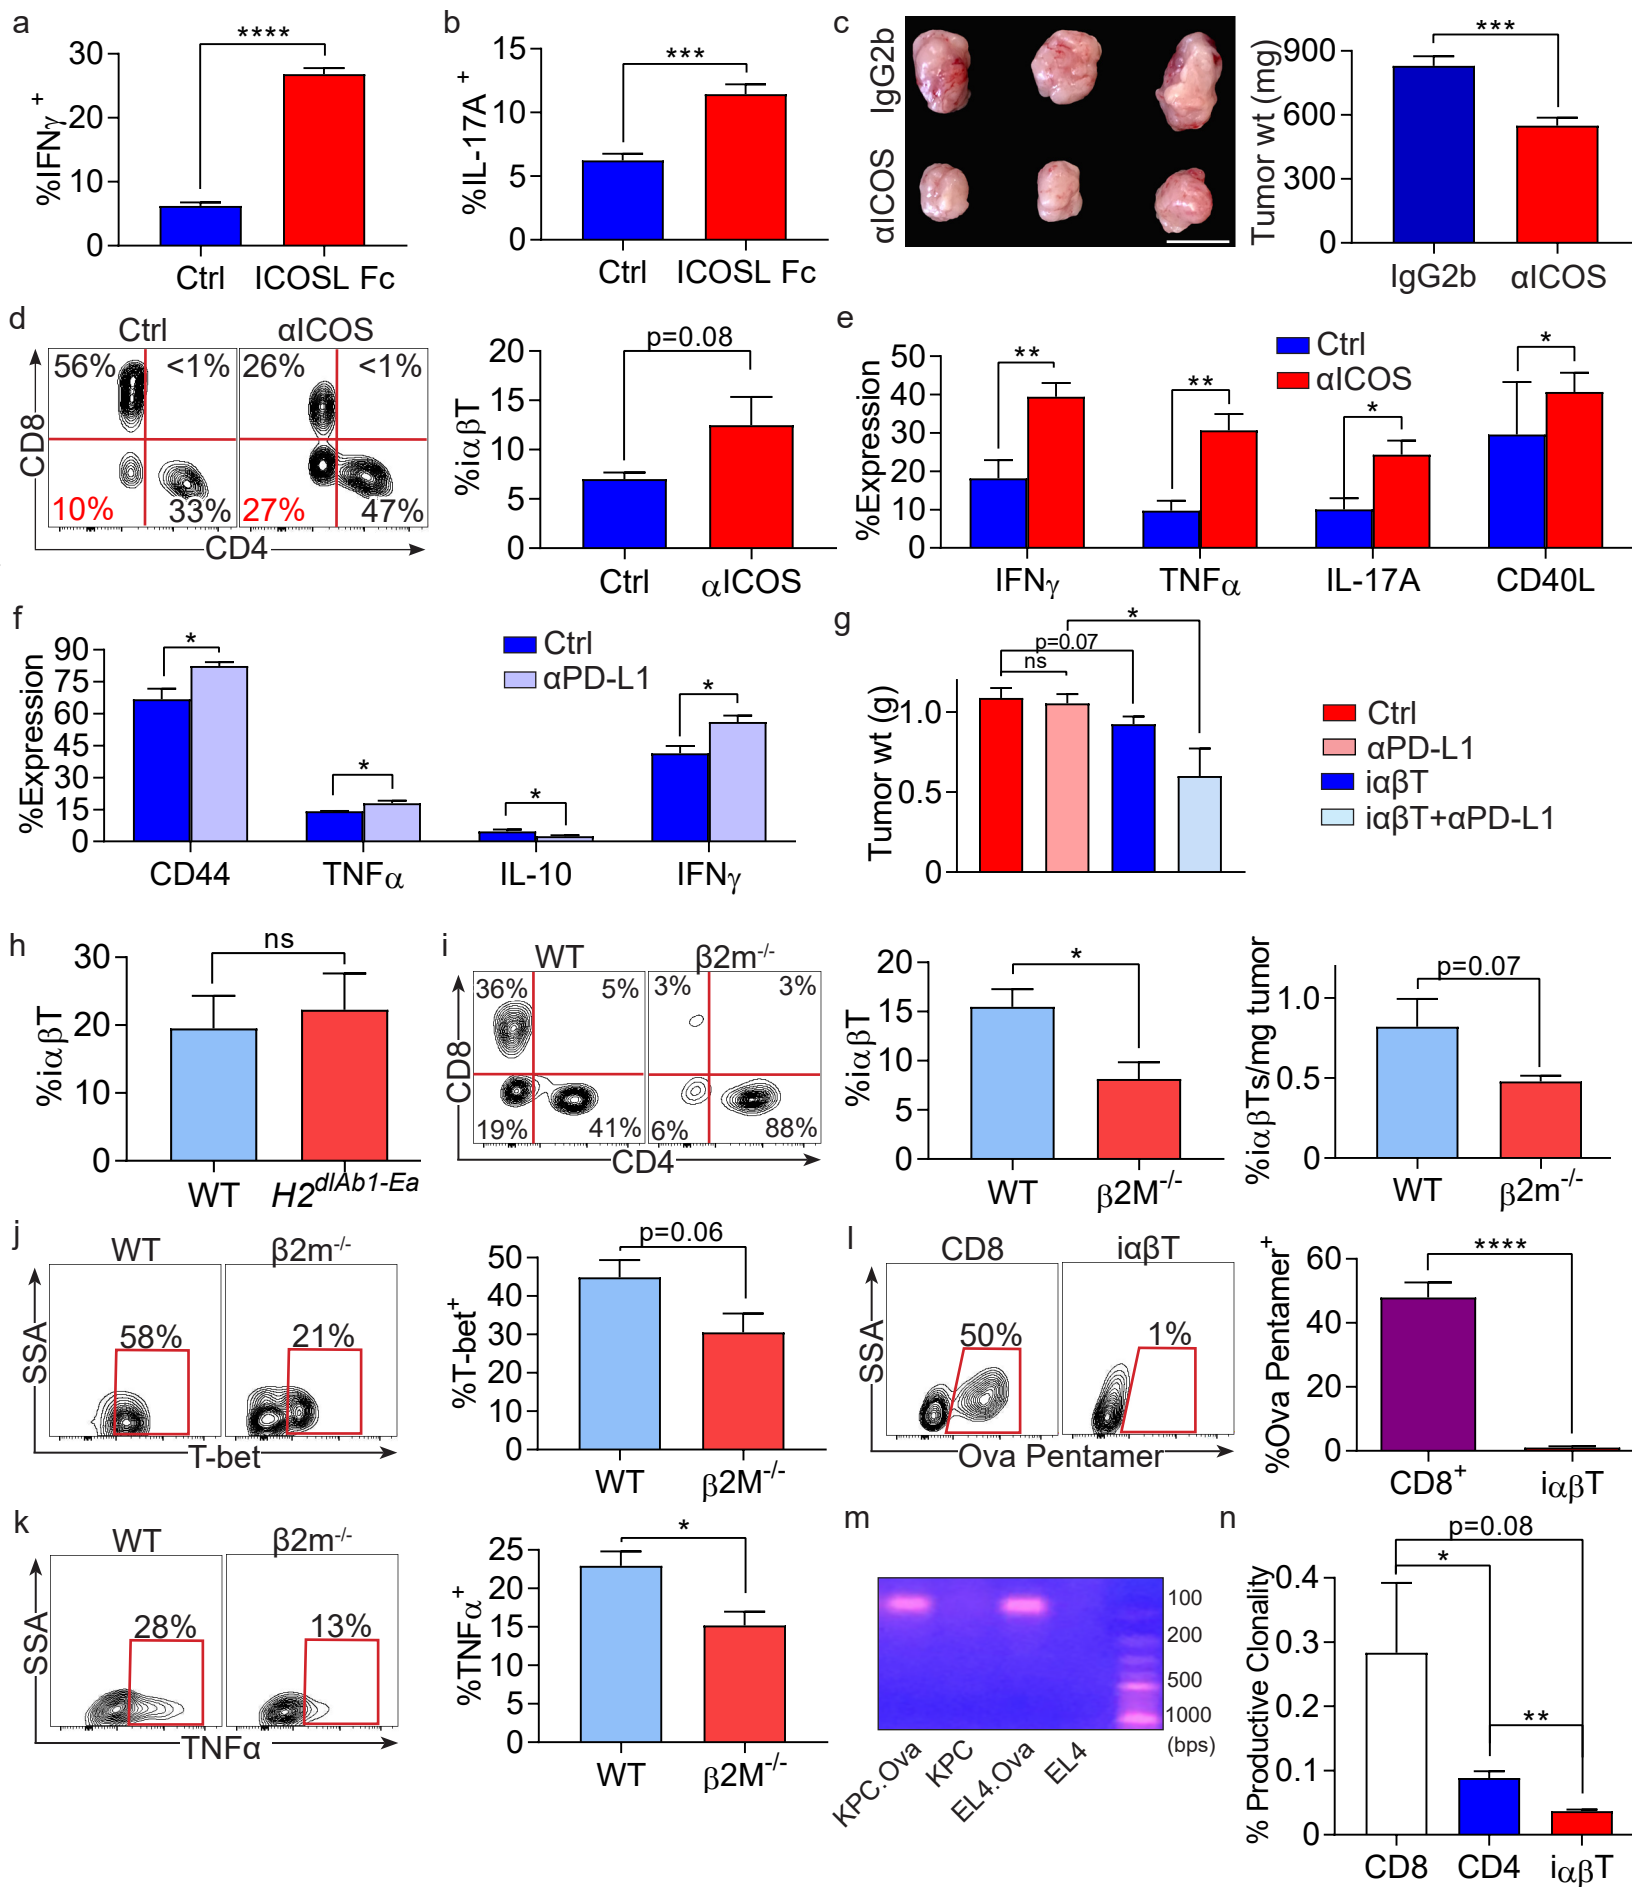

**Figure S3.  $\text{i}\alpha\beta\text{T}$ s are activated by checkpoint and costimulatory receptor targeted immunotherapies.** (a, b) Splenic  $\text{i}\alpha\beta\text{T}$ s were activated *in vitro* with plate-bound  $\alpha\text{CD3}$  in the presence of ICOSL Fc or vehicle for 72h and tested for expression of (a)  $\text{IFN}\gamma$  and (b) IL-17A. This experiment was repeated twice in replicates of 5. (c-e) Orthotopic PDA-bearing WT mice were serially treated with an agonizing  $\alpha\text{ICOS}$  mAb or isotype control. Tumors were harvested at 21 days (n=5/group). (c) Representative pictures of tumors and quantitative analysis of tumor weights are shown. (d) The fraction of  $\text{CD4}^+$ ,  $\text{CD8}^+$ , and  $\text{i}\alpha\beta\text{T}$ s among  $\text{TCR}\beta^+\text{NK1.1}^-$  T cells was determined in the ICOS agonist treated and control groups. Representative contour plots and quantitative data are shown. (e)  $\text{i}\alpha\beta\text{T}$  cell expression of  $\text{IFN}\gamma$ ,  $\text{TNF}\alpha$ , IL-17A, and CD40L were measured in each cohort. (f) Orthotopic PDA-bearing WT mice were serially treated with a neutralizing  $\alpha\text{PD-L1}$  mAb or isotype control (n=5/group). Tumors were harvested at 21 days and tumor-infiltrating  $\text{i}\alpha\beta\text{T}$  cell expression of CD44,  $\text{TNF}\alpha$ , IL-10, and  $\text{IFN}\gamma$  were measured in each cohort. Each *in vivo* experiment was repeated more than 3 times. (g) Orthotopic PDA-bearing WT mice were serially treated with a neutralizing  $\alpha\text{PD-L1}$  mAb alone,  $\text{i}\alpha\beta\text{T}$  cell transfer alone, or both in combination. Tumor weight on day 21 is shown (n=5/group). (h) Orthotopic PDA-bearing WT and  $\text{MHCII}^{-/-}$  mice were analyzed for the frequency of tumor-infiltrating  $\text{i}\alpha\beta\text{T}$  cells among all  $\text{TCR}\beta^+$  T cells. (i-k) Orthotopic PDA-bearing WT and  $\beta 2\text{m}^{-/-}$  mice were analyzed for (i) the frequency of tumor-infiltrating  $\text{i}\alpha\beta\text{T}$ s, and (j)  $\text{i}\alpha\beta\text{T}$  cell expression of T-bet and (k)  $\text{TNF}\alpha$ . Representative contour plots and quantitative data are shown (n=5/group). This experiment was repeated 3 times. (l, m) WT mice were orthotopically implanted with KPC-derived tumor cells engineered to express Ovalbumin (KPC.Ova). (l) On day 21, KPC.Ova tumors were harvested, digested, and  $\text{CD8}^+$  T cells and  $\text{i}\alpha\beta\text{T}$ s were assayed using an Ova<sub>257-264</sub>-Pentamer. Representative contour plots and quantitative data are shown (n=5/group). (m) PCR for Ovalbumin expression in KPC and KPC.Ova tumors are shown. EL4 and EL4.Ova tumor cells were used as controls. (n) TCR Sequencing was performed in triplicate on PDA-infiltrating  $\text{CD4}^+$ ,  $\text{CD8}^+$ , and  $\text{i}\alpha\beta\text{T}$ s and populations were assessed for productive clonality (\* $p < 0.05$ , \*\* $p < 0.01$ , \*\*\* $p < 0.001$ , \*\*\*\* $p < 0.0001$ ).

Figure S4

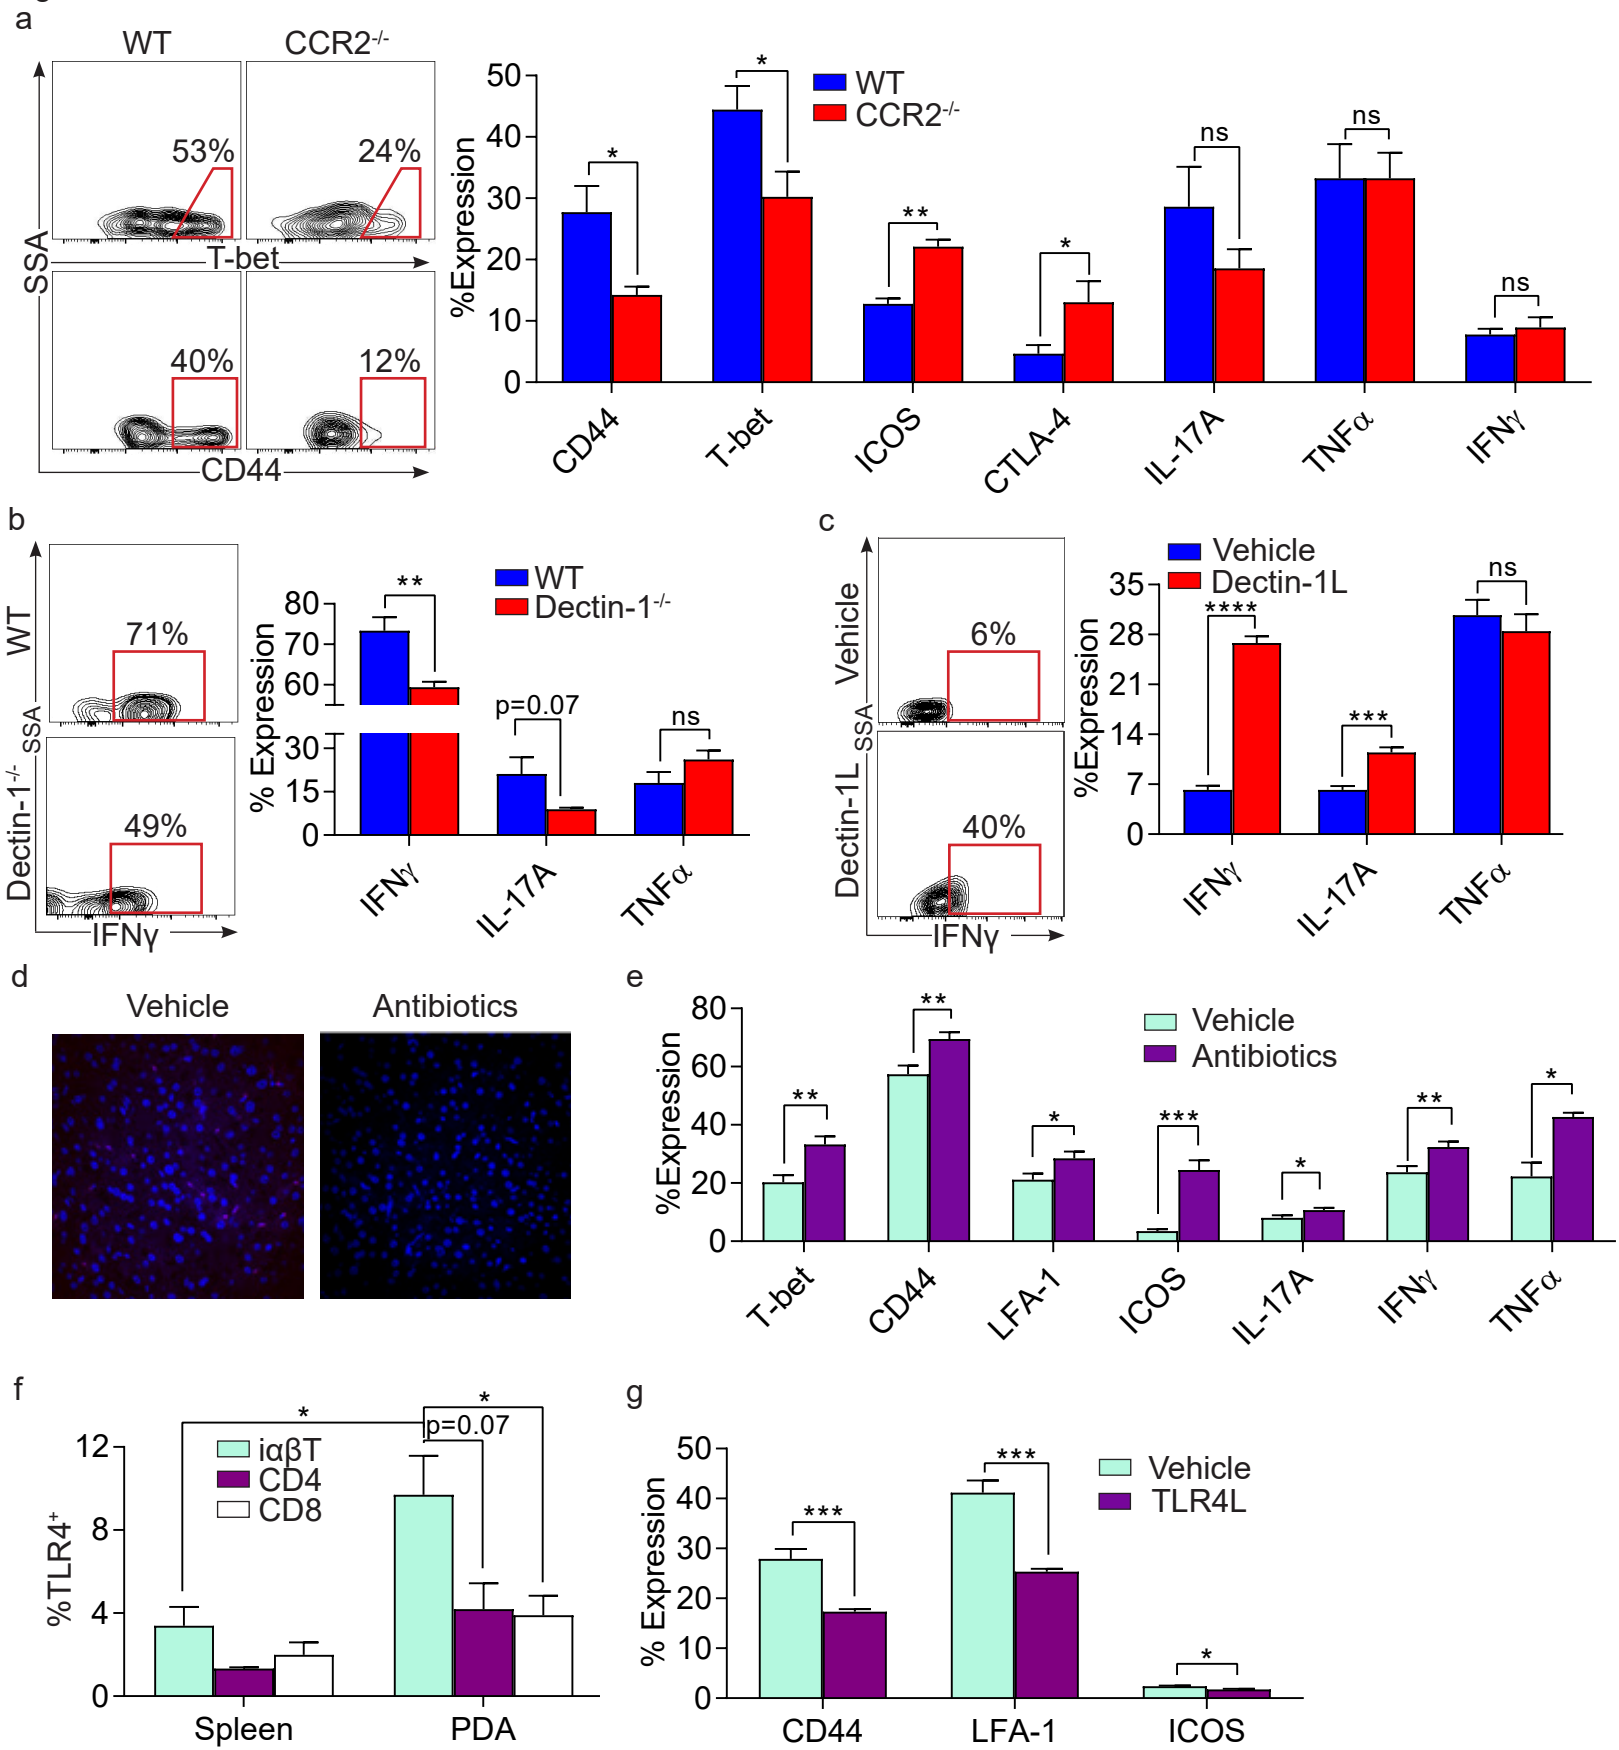

**Figure S4. Selective modulation of  $\alpha\beta$ T cell phenotype by sterile and microbial signals.** (a) Orthotopic PDA tumors were harvested from WT and  $CCR2^{-/-}$  mice.  $\alpha\beta$ Ts were gated on flow cytometry and tested for expression of CD44, T-bet, ICOS, CTLA-4, IL-17A, TNF $\alpha$ , and IFN $\gamma$  (n=5/group). This experiment was repeated 3 times. (b) Orthotopic PDA tumors were harvested from WT and Dectin-1 $^{-/-}$  mice on day 21 and tested for expression of IFN $\gamma$ , IL-17, and TNF $\alpha$ . Select representative contour plots and quantitative data are shown. This experiment was performed in replicates of 5 and repeated 3 times. (c) Splenic  $\alpha\beta$ Ts from naïve WT were harvested and activated *in vitro* by CD3 ligation, either alone or in the presence of the Dectin-1 ligand depleted zymosan.  $\alpha\beta$ T cell expression of IFN $\gamma$ , IL-17A, and TNF $\alpha$  was determined at 72h. Select representative contour plots and quantitative data are shown. This experiment was performed in replicates of 5 and repeated 3 times. (d) Bacterial abundance in PDA tumors in control and oral antibiotic-treated mice was tested by 16S rRNA FISH. (e) PDA-infiltrating  $\alpha\beta$ Ts in control and oral antibiotic-treated hosts were tested for expression of (e) T-bet, CD44, LFA-1, ICOS, IL-17A, IFN $\gamma$ , and TNF $\alpha$ . Representative contour plots and quantitative data are shown. This experiment was repeated 3 times (n=5/group). (f) Splenic and orthotopic PDA-infiltrating  $\alpha\beta$ Ts, CD4 $^{+}$  T cells, and CD8 $^{+}$  T cells, and were tested for expression of TLR4 (n=5 mice). (g) Orthotopic PDA-bearing WT mice were serially treated i.p. with TLR4 ligand LPS or vehicle and  $\alpha\beta$ Ts were harvested and tested for expression of CD44, LFA-1, and ICOS (n=5/group). This experiment was repeated 3 times (\*p<0.05, \*\*p<0.01, \*\*\*p<0.001, \*\*\*\*p<0.0001).



Figure S5

a

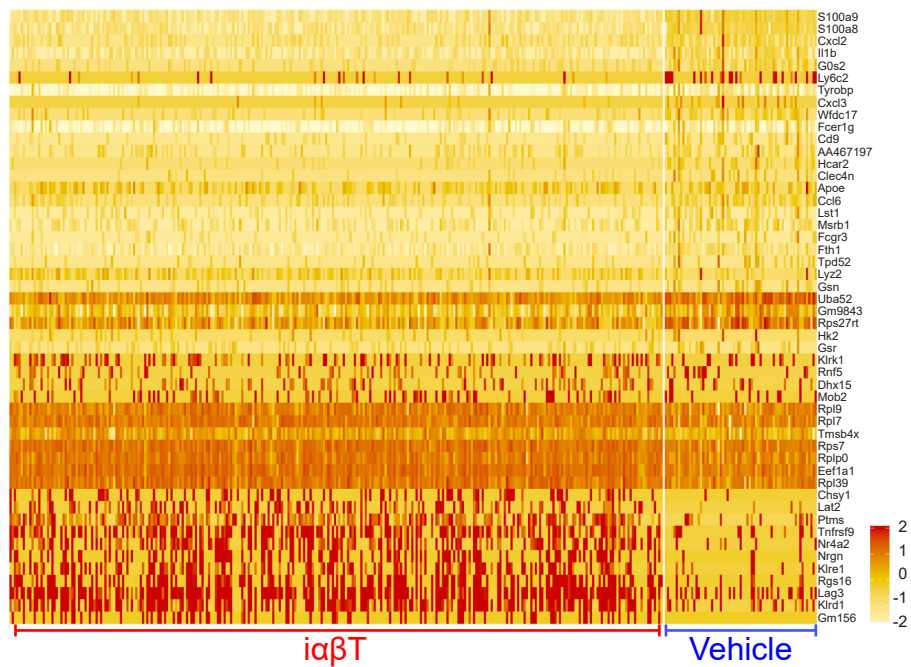

b

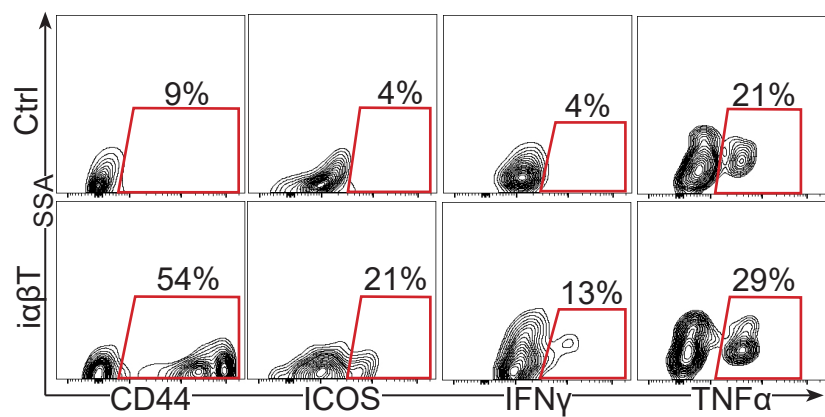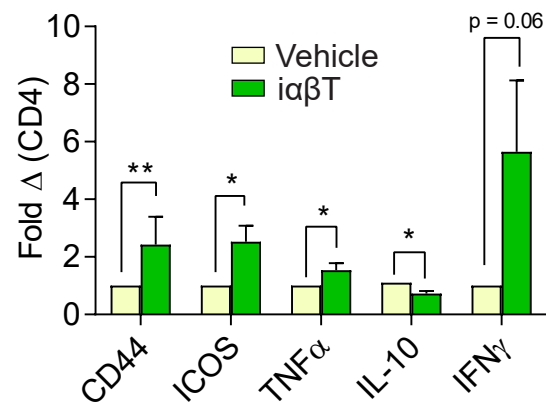

c

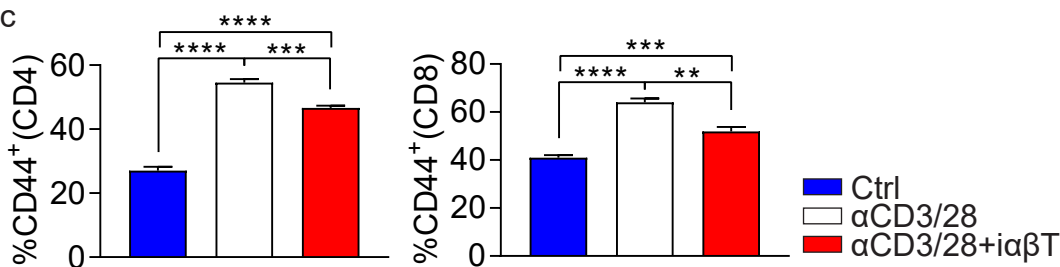

d

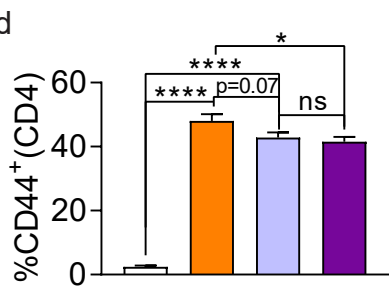

e

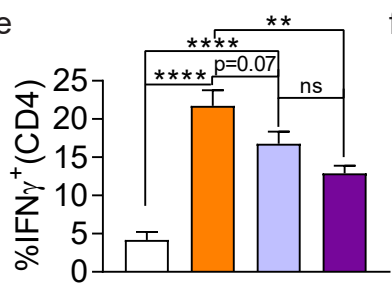

f

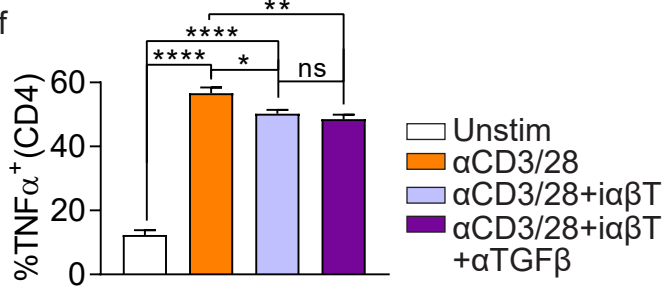

**Figure S5.  $\alpha\beta$ Ts enhance adaptive immunity in murine and human PDA but regulate conventional T cell activation *in vitro*.** (a) Mice with established orthotopic KPC tumor were serially transferred i.v. twice weekly with  $\alpha\beta$ Ts or vehicle beginning on day 5. Mice were sacrificed at day 21 and single cell RNAseq was performed on FACS-purified CD45<sup>+</sup> tumor-infiltrating leukocytes. The distribution of cellular clusters was determined using the t-SNE algorithm. A heat map indicates the top 50 differentially expressed genes in the T cell cluster between the two treatment groups. (b) PDOTS derived from resected human tumors were treated with autologous  $\alpha\beta$ Ts or vehicle. CD4<sup>+</sup> T cells were analyzed for expression of CD44, ICOS, IFN $\gamma$ , TNF $\alpha$ , and IL-10. Representative contour plots from human PDA PDOTS experiment and quantitative data indicating fold-change in expression the CD4<sup>+</sup> T cells in  $\alpha\beta$ T-treated PDOTS compared to vehicle-treated PDOTS are shown (n=5 patients). (c) Polyclonal CD4<sup>+</sup> and CD8<sup>+</sup> T cells were cultured without stimulation, stimulated by CD3/CD28 co-ligation, or stimulated by CD3/CD28 co-ligation in co-culture with  $\alpha\beta$ Ts. CD4<sup>+</sup> and CD8<sup>+</sup> T cell activation were determined at 72h by expression of CD44. This experiment was repeated 4 times in replicates of 5. (d-f) Polyclonal CD4<sup>+</sup> T cells were cultured without stimulation or stimulated by CD3/CD28 co-ligation, alone or in co-culture with  $\alpha\beta$ Ts. A neutralizing  $\alpha$ -TGF $\beta$  mAb or isotype control was added to select wells. CD4<sup>+</sup> T cell activation was determined at 72h by expression of (d) CD44, (e) IFN $\gamma$  and (f) TNF $\alpha$ . This experiment was repeated twice in replicates of 5 (\*p<0.05, \*\*p<0.01, \*\*\*p<0.001, \*\*\*\*p<0.0001).

Figure S6

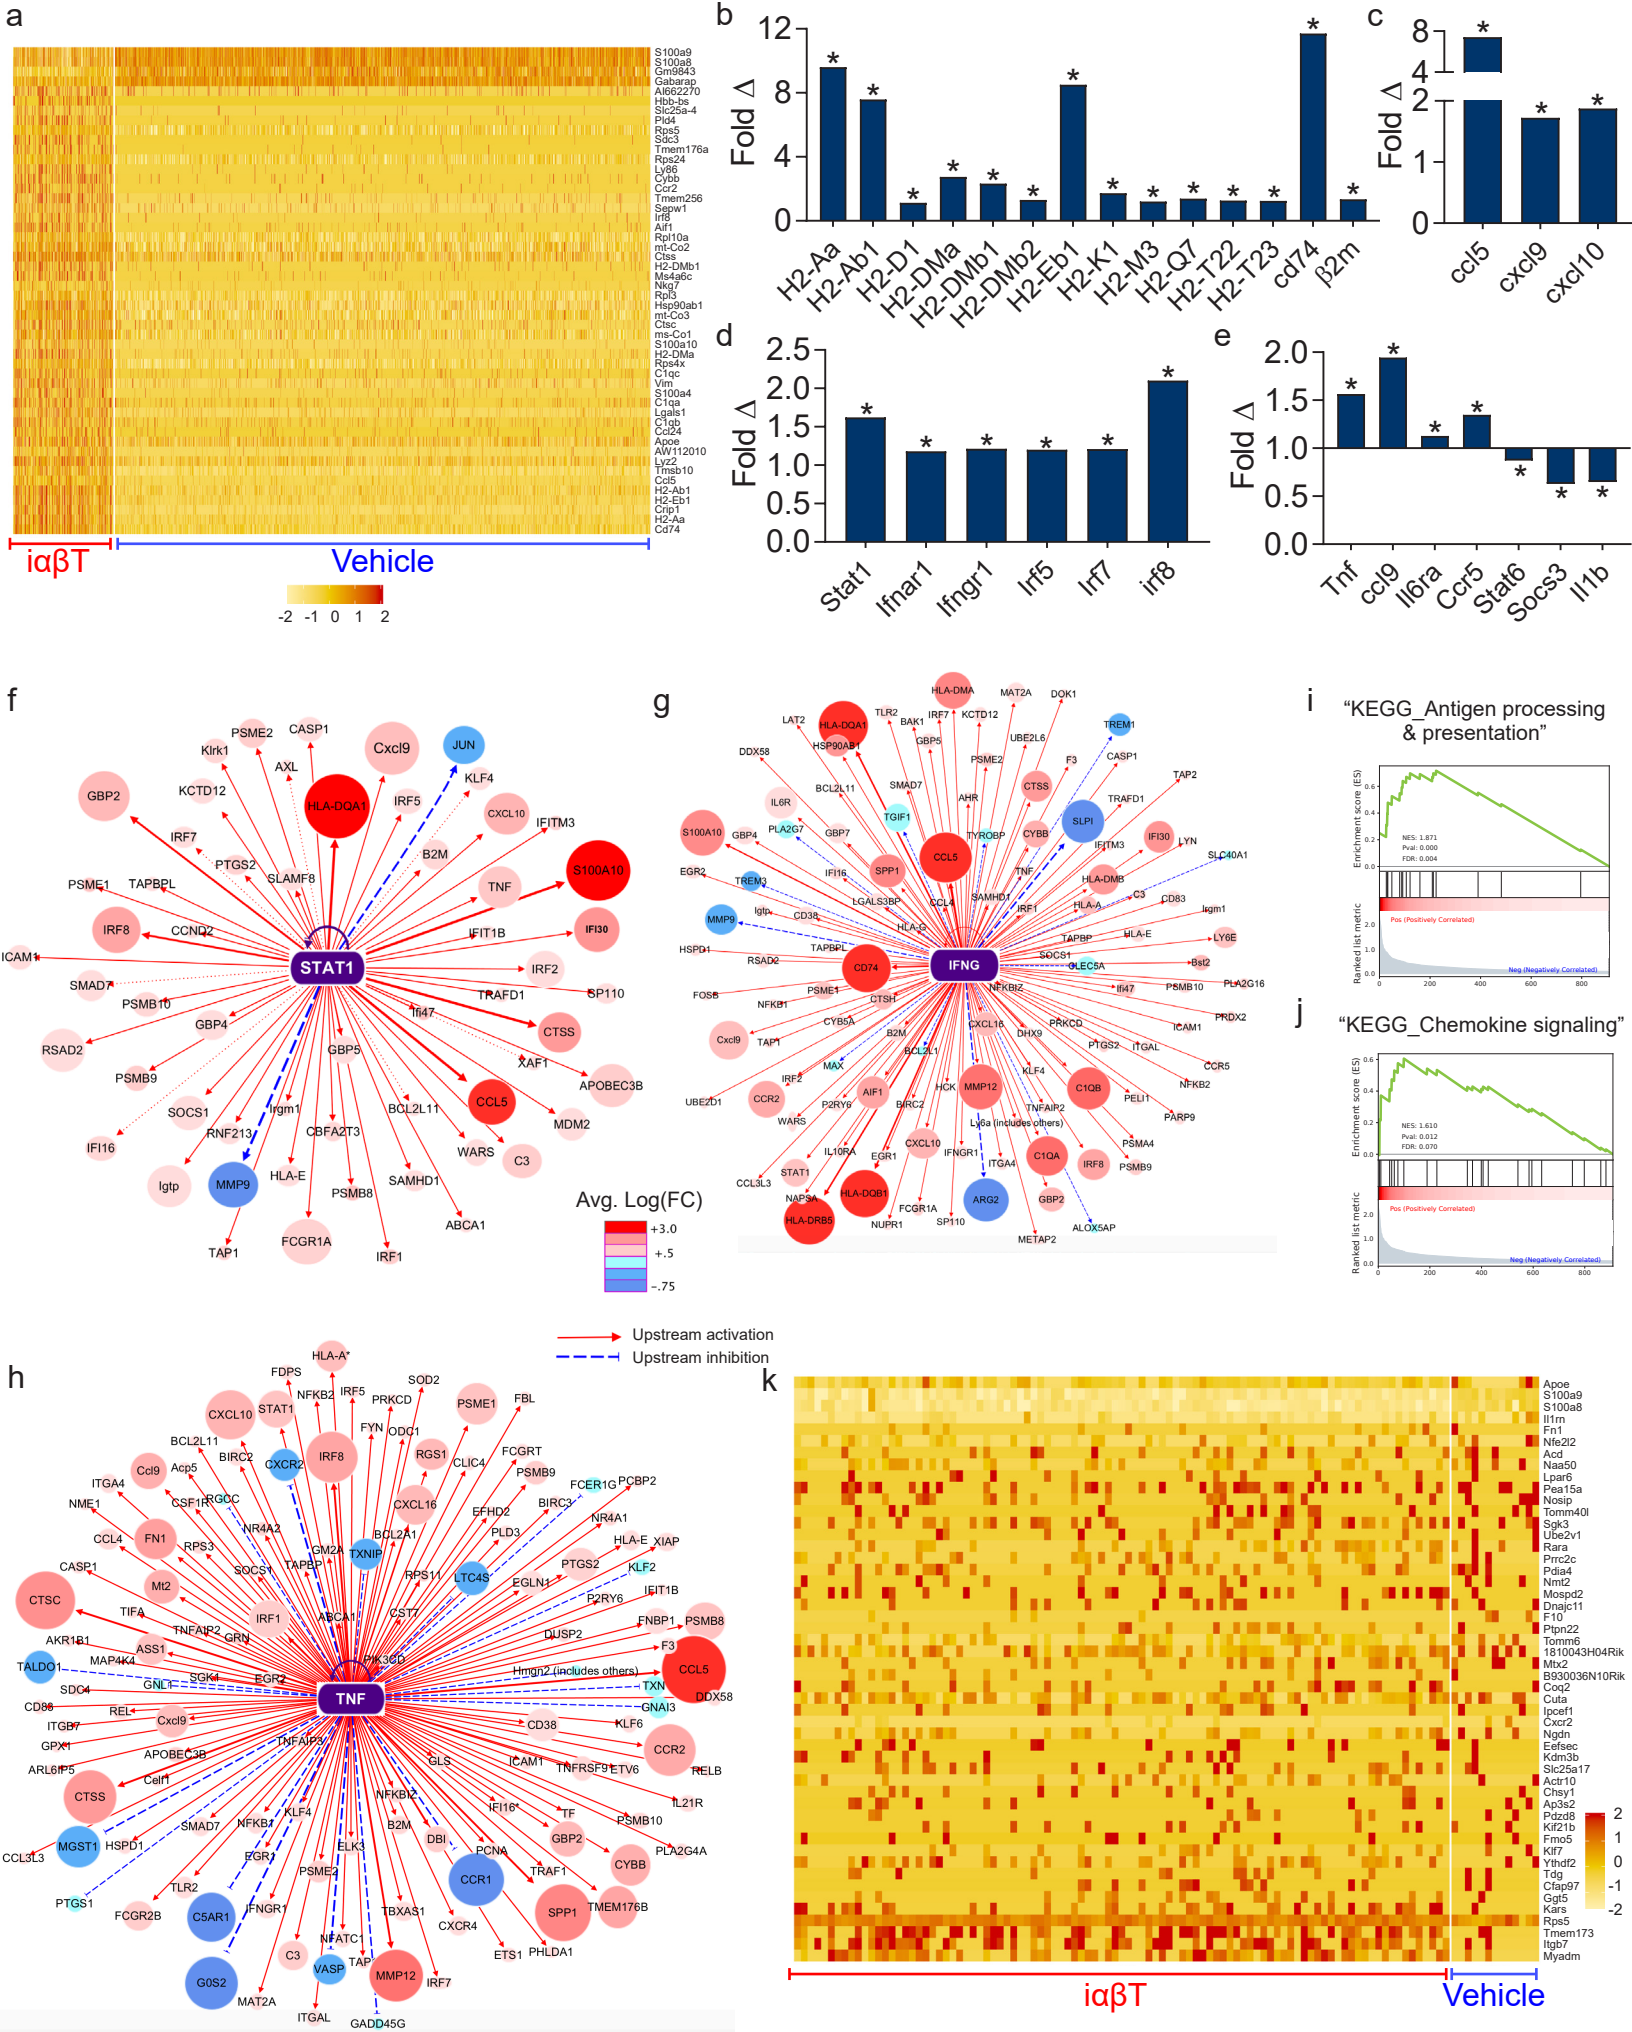

**Figure S6.  $\alpha\beta$ T adoptive transfer confers an immunogenic phenotype in TAMs.** (a) Mice with established orthotopic KPC tumor were serially transferred i.v. twice weekly with  $\alpha\beta$ Ts or vehicle beginning on day 5. Mice were sacrificed at day 21 and single cell RNAseq performed on FACS-purified CD45<sup>+</sup> tumor-infiltrating leukocytes. The distribution of cellular clusters was determined using the t-SNE algorithm. A heat map indicates the top 50 differentially expressed genes in the macrophage cluster between the two treatment groups. (b-e) Differential expression ( $\alpha\beta$ T vs vehicle) of select genes in the macrophage cluster related to (b) antigen-presentation, (c) T cell chemoattraction, (d) IFN signaling, and (e) macrophage polarization. (f-h) Bubble plots depicting upstream activation of (f) STAT1, (g) TNF $\alpha$ , and (h) IFN $\gamma$  signaling based on ingenuity pathway analysis of upstream regulators in macrophages infiltrating  $\alpha\beta$ T cell-treated PDA tumors compared with vehicle treatment. (i, j) GSEA showing enrichment of (i) “KEGG\_Antigen processing and presentation” and (j) “KEGG\_Chemokine signaling pathway” in the macrophage cluster in  $\alpha\beta$ T cell-treated PDA. (k) A heat map indicates the top 50 differentially expressed genes in the CX3CR1<sup>+</sup> Macrophage cluster between the two treatment groups (\*p<0.0001).

Figure S7

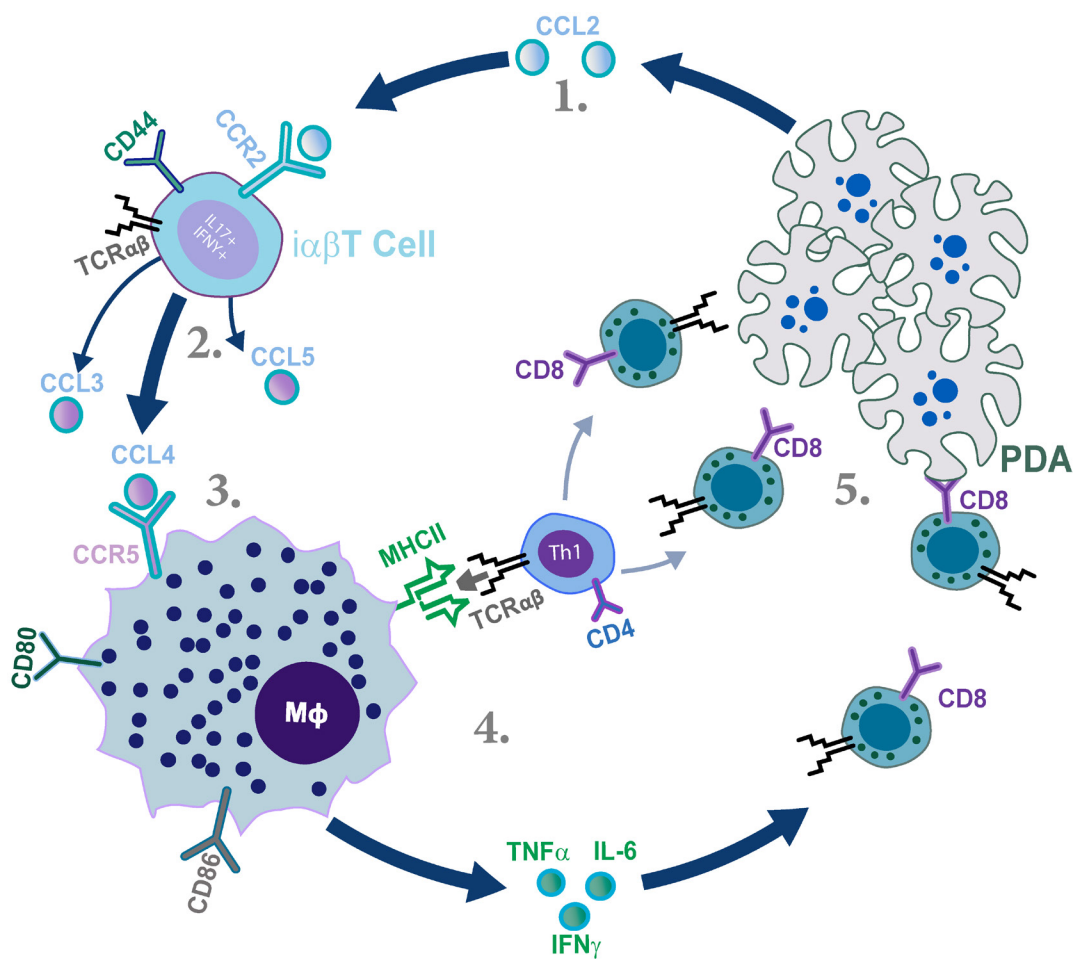

**Figure S7. Schematic depicting recruitment and immunogenic properties of  $\alpha\beta$ Ts in PDA.** 1. Tumor derived CCL2 recruits  $\alpha\beta$ T cells to the PDA TME. 2. PDA-infiltrating  $\alpha\beta$ T cells secrete CCR5 ligands. 3. CCL3, CCL4, and CCL5 bind to CCR5 on TAMs and induce an M1-phenotype. 4. Activated TAMs promote immunogenic CD4<sup>+</sup> and CD8<sup>+</sup> differentiation and expansion. 5. Cytotoxic CD8<sup>+</sup> T cells induce tumor cell death.
